# Supplementary material for: Analyzing the Organoleptic Quality of Commercial Extra Virgin Olive Oils: IOC Recognized Panel Tests vs. Electronic Nose
Source: MDPI journal article supplement (doi:10.3390/foods11101477), 2022-05-19
Supplement: s1 [file s1]

# Analyzing the Organoleptic Quality of Commercial Extra Virgin Olive Oils: IOC Recognized Panel Tests vs. Electronic Nose – Supplementary Materials

Irene Chacón, Javier Roales, Tânia Lopes-Costa and José M. Pedrosa \*

Departamento de Sistemas Físicos, Químicos y Naturales, Universidad Pablo de Olavide, 41013 Sevilla, Spain; ichacob@alu.upo.es (I.C.); jroabat@upo.es (J.R.); tlopcos@upo.es (T.L.-C.)

\* Correspondence: jmpedpoy@upo.es

**Table S1.** Quality parameters for the classification of olive oil according to the IOC.

| Category                  | Free acidity (% m/m as oleic acid) | Peroxide value (mEq O <sub>2</sub> /Kg oil) | Absorbance in UV K (270 nm (cyclohexane)/ 268 nm (iso-octane)) | Fatty acid ethyl esters (mg/kg) | Organoleptic characteristics |                                |
|---------------------------|------------------------------------|---------------------------------------------|----------------------------------------------------------------|---------------------------------|------------------------------|--------------------------------|
|                           |                                    |                                             |                                                                |                                 | Median of defect             | Median of the fruity attribute |
| Extra virgin olive oil    | ≤ 0.8                              | ≤ 20.0                                      | ≤ 0.22                                                         | ≤ 35                            | Me = 0.0                     | Me > 0.0                       |
| Virgin olive oil          | ≤ 2.0                              | ≤ 20.0                                      | ≤ 0.25                                                         | -                               | 0.0 < Me ≤ 3.5               | Me > 0.0                       |
| Ordinary virgin olive oil | ≤ 3.3                              | ≤ 20.0                                      | ≤ 0.30                                                         | -                               | 0.0 < Me ≤ 6.0 *             | -                              |
| Lampante                  | > 3.3                              | no limit                                    | -                                                              | -                               | Me > 6.0                     | -                              |

\* Or when the median of the defects is ≤ 3.5 and the median of the fruity attribute is = 0.0.

**Table S2.** Sensor chamber configuration in the EOS835.

| Sensor | Manufacturer reference | Operating temperature (°C) |
|--------|------------------------|----------------------------|
| 1      | STO210                 | 400                        |
| 2      | 2600_13                | 465                        |
| 3      | SD0316                 | 400                        |
| 4      | ZH0507                 | 350                        |
| 5      | SJ0706                 | 450                        |
| 6      | 2620_10                | 400                        |

**Table S3.** Panels approved by the IOC available in Spain, along with their location, price for sample and estimated time for the delivery of results.

| Laboratory                                                                                                                                             | City              | Price                  | Estimated delivery time |
|--------------------------------------------------------------------------------------------------------------------------------------------------------|-------------------|------------------------|-------------------------|
| Panel de catadores de aceite de oliva virgen de Aragón. Diputación General de Aragón                                                                   | Alcañiz           | -                      | -                       |
| Panel de catadores de aceites de oliva virgen de Madrid. IM-IDRA                                                                                       | Alcalá de Henares | 61,50 €/sample + taxes | Month and a half        |
| Laboratorio Agroalimentario Atarfe. Dirección General de Industrias y Promoción Agroalimentaria. Consejería de Agricultura y Pesca. Junta de Andalucía | Atarfe            | 11,45 €/sample         | Month and a half        |

|                                                                                                                                                              |                  |                                        |                  |
|--------------------------------------------------------------------------------------------------------------------------------------------------------------|------------------|----------------------------------------|------------------|
| Laboratorio Agroalimentario de Valencia. Conselleria de Agricultura, Pesca, Alimentación y Agua. Generalitat Valenciana                                      | Burjassot        | 86,10 €/sample                         | Two weeks        |
| Laboratorio Agroalimentario de Extremadura. Consejería de Agricultura y Desarrollo Rural. Dirección General de Explotaciones Agrarias y Calidad Alimentaria. | Cáceres          | 55,55 €/sample                         | Two months       |
| Laboratorio Agroalimentario de Córdoba. Dirección General de Industrias y Promoción Agroalimentaria. Consejería de Agricultura y Pesca. Junta de Andalucía   | Córdoba          | 19,01 €/sample                         | Month and a half |
| Laboratorio Arbitral Agroalimentario. Subdirección General de Laboratorios Agroalimentarios. Ministerio de Agricultura, Alimentación y Medio Ambiente.       | Madrid           | 75 €/sample                            | Three weeks      |
| Laboratorio Central de Aduana e I.I.EE. Subdirección General Químico- Tecnológica                                                                            | Madrid           | Only for the Tributary Agency of Spain | -                |
| Centro de Investigación y Control de la Calidad. Instituto Nacional del Consumo. Ministerio de Sanidad, Política Social e Igualdad                           | Madrid           | Only for public bodies                 | -                |
| Panel de catadores de aceite de oliva virgen de Murcia. Centro Integrado de Formación y Experiencias Agrarias de Molina de Segura                            | Molina de Segura | 20 €/sample                            | One month        |
| Panel de catadores de aceite de oliva virgen de Cataluña. Departamento de Agricultura, Ganadería y Pesca.                                                    | Reus             | 78,17 €/sample                         | Two weeks        |
| Instituto de la Grasa y sus derivados. Consejo Superior de Investigaciones Científicas.                                                                      | Sevilla          | 134 €/sample + taxes                   | One month        |
| Panel de Catadores de la Comunidad Foral de Navarra                                                                                                          | Villava          | 93€/sample + taxes                     | Three weeks      |

**Table S4.** Average PC1 and standard deviation for each of the olive oil brands.

|    | Average PC1 | Standard deviation |
|----|-------------|--------------------|
| B1 | -1.694      | 0.223              |
| B2 | -1.394      | 0.134              |
| B3 | -0.518      | 0.343              |
| B5 | -0.105      | 0.341              |
| B4 | 0.323       | 0.147              |
| B6 | 3.743       | 0.434              |

**Table S5.** Average aroma intensity and PC2 for each of the olive oil brands.

|    | Aroma intensity | PC2     |          |
|----|-----------------|---------|----------|
|    |                 | Average | St. dev. |
| B1 | 5               | -0.151  | 0.547    |
| B2 | 5.067           | -0.224  | 0.162    |
| B3 | 5.067           | -0.127  | 0.545    |
| B4 | 5.333           | 1.188   | 0.512    |
| B5 | 5.533           | 0.999   | 0.176    |
| B6 | 5.167           | -0.766  | 0.149    |

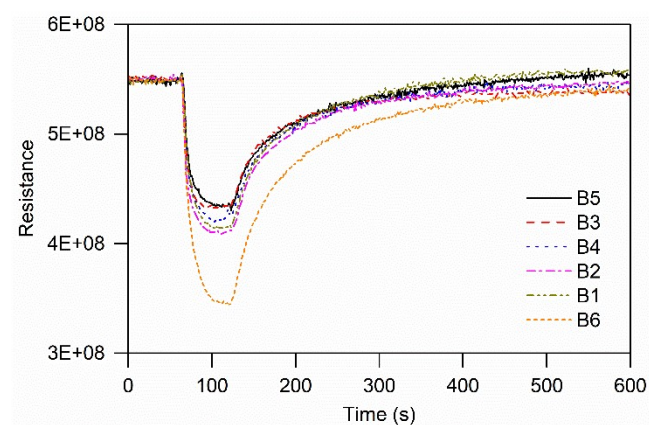

**Figure S1.** Response of one of the sensors in the EOS (S4) towards the six analyzed VOOs.

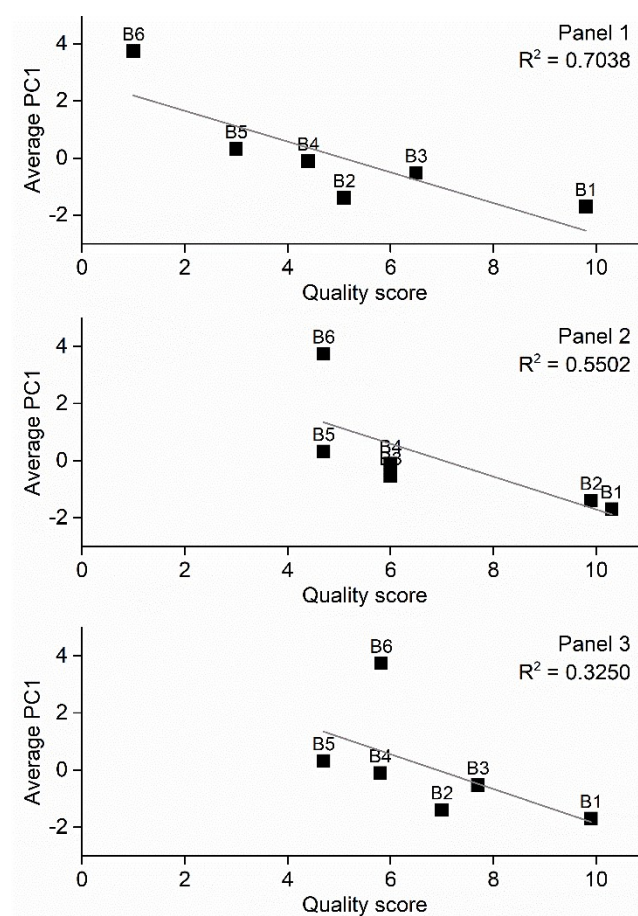

**Figure S2.** Correlations between quality scores calculated from each of the panel tests and average PC1 obtained from the EOS.

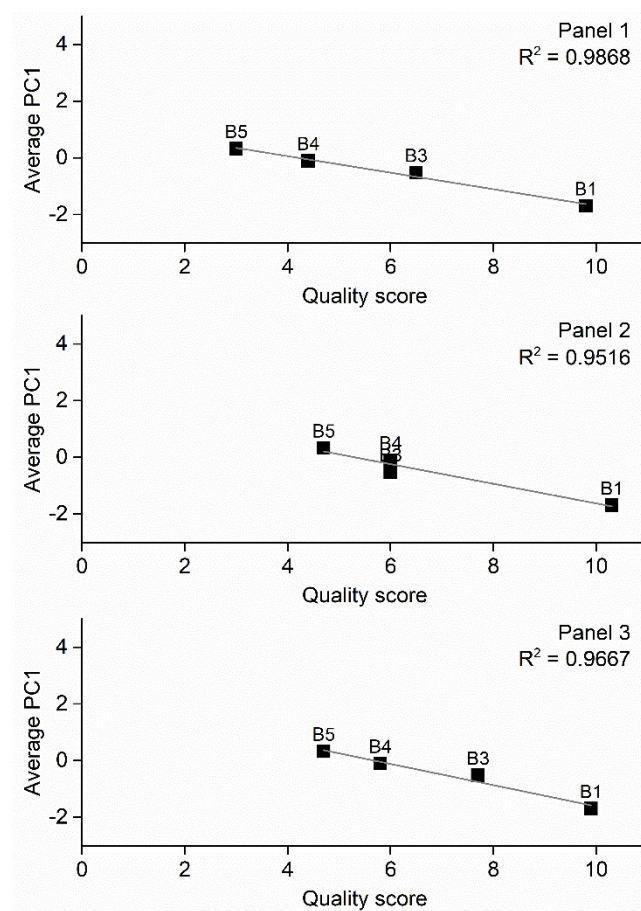

**Figure S3.** Correlations between quality scores calculated from each of the panel tests and average PC1 obtained from the EOS, excluding the data corresponding to B2 and B6.
